# Supplementary material
Source: ML conference proceedings conference paper supplement (https://proceedings.neurips.cc/paper_files/paper/2021/hash/47bd8ac1becf213f155a82244b4a696a-Abstract.html)
Supplement: Supplementary file 1 [file 47bd8ac1becf213f155a82244b4a696a-Supplemental.zip]

Archive with 10 entries (10 files):
- camera-appendix.pdf
- __MACOSX/._camera-appendix.pdf
- AGD_quartic_decrease.m
- AGD_exp_decrease.m
- AGD_cosine_decrease.m
- dimension_dependence.m
- neon_exp.m
- neon_cosine.m
- quartic_decrease.m
- stochastic_cubic_decrease.m
